# Supplementary material for: High resolution Raman spectroscopy mapping of stem cell micropatterns
Source: Royal Society of Chemistry journal article supplement (doi:10.1039/c4an02346c), 2015-01-01
Supplement: c4an02346c1.pdf [file c4an02346c1.pdf]

Supplementary Material:

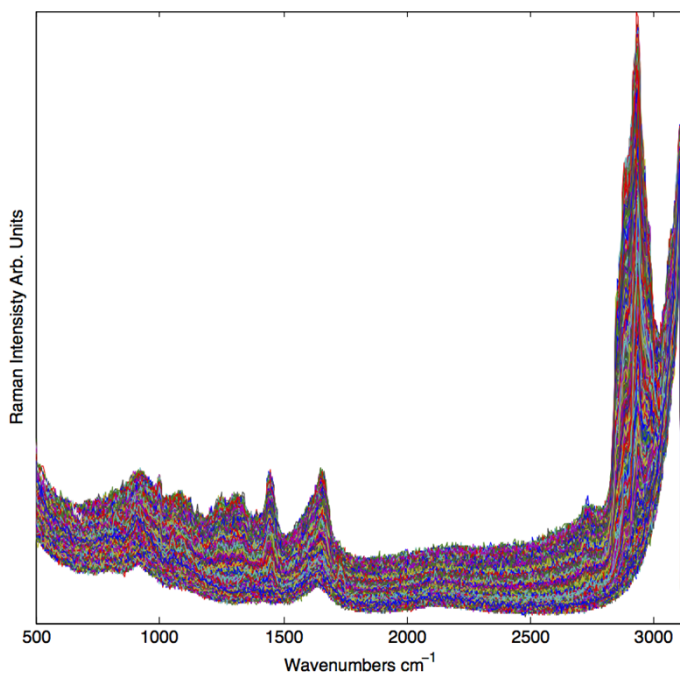

Figure S1: Example of Raw data before Extended Multiplicative Scater Correction and Spectral Interference Subtraction (EMSC-SIS), Correction spectra.

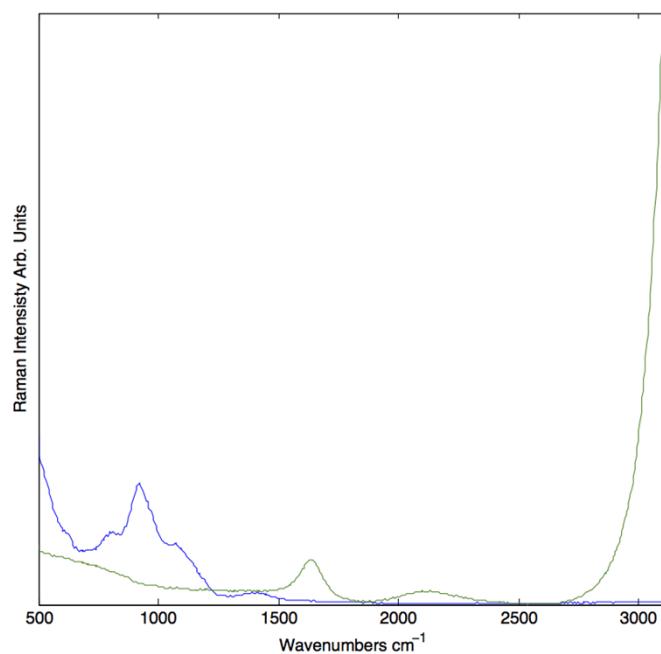

Figure S2: Spectra of water (green) and glass (blue) used for correction of backgrounds.

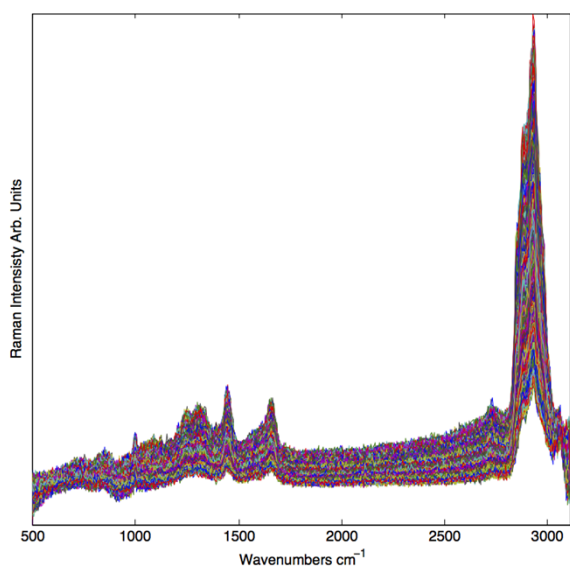

Figure S3: Dataset after correction using EMSC-SIS.
